# Supplementary material for: A new perspective on how humans assess their surroundings; derivation of head orientation and its role in ‘framing’ the environment
Source: PeerJ journal article supplement (doi:10.7717/peerj.908), 2015-06-18
Supplement: Katherine_Hinds.pdf [file Katherine_Hinds.pdf]

Stet Oakley 6,  
University of Reading,  
Reading,  
Berkshire,  
RG6 6JE  
18/03/2015

To whom it may concern,

I, Katherine Hinds, hereby permit the use of my photo depicting my face in the manuscript "A new perspective on how humans assess their surroundings; derivation of head orientation and its role in 'framing' the environment".

Faithfully,

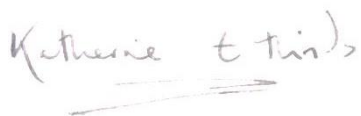A handwritten signature in cursive script that reads "Katherine Hinds". The signature is written in dark ink and is underlined with a single horizontal stroke.

Katherine Hinds
